# Supplementary material
Source: MDPI journal article supplement (https://www.mdpi.com/1999-4907/8/11/450)
Supplement: s1 [file s1]

Article

Responses of contrasting tree functional types to air warming and drought

Elisabet Martínez-Sancho 1,*, Lizeth K. Vásconez Navas 1, Hannes Seidel 1, Isabel Dorado-Liñán 2and Annette Menzel 1, 3


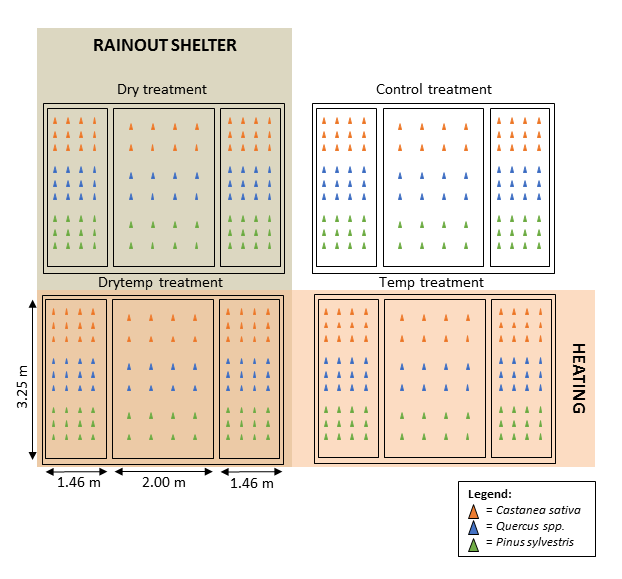


**Figure S1**. Climatic treatments, density arrangement and dimensions of the common garden site. The complete parcel has an area of 87m2 divided into four equal plots of 18.85 m2 each. Within every plot three subplots were delimited, two subplots containing seedlings planted in high density (0.13 m2 per seedling) and one subplot with seedlings planted in low density (0.27 m2 per seedling).


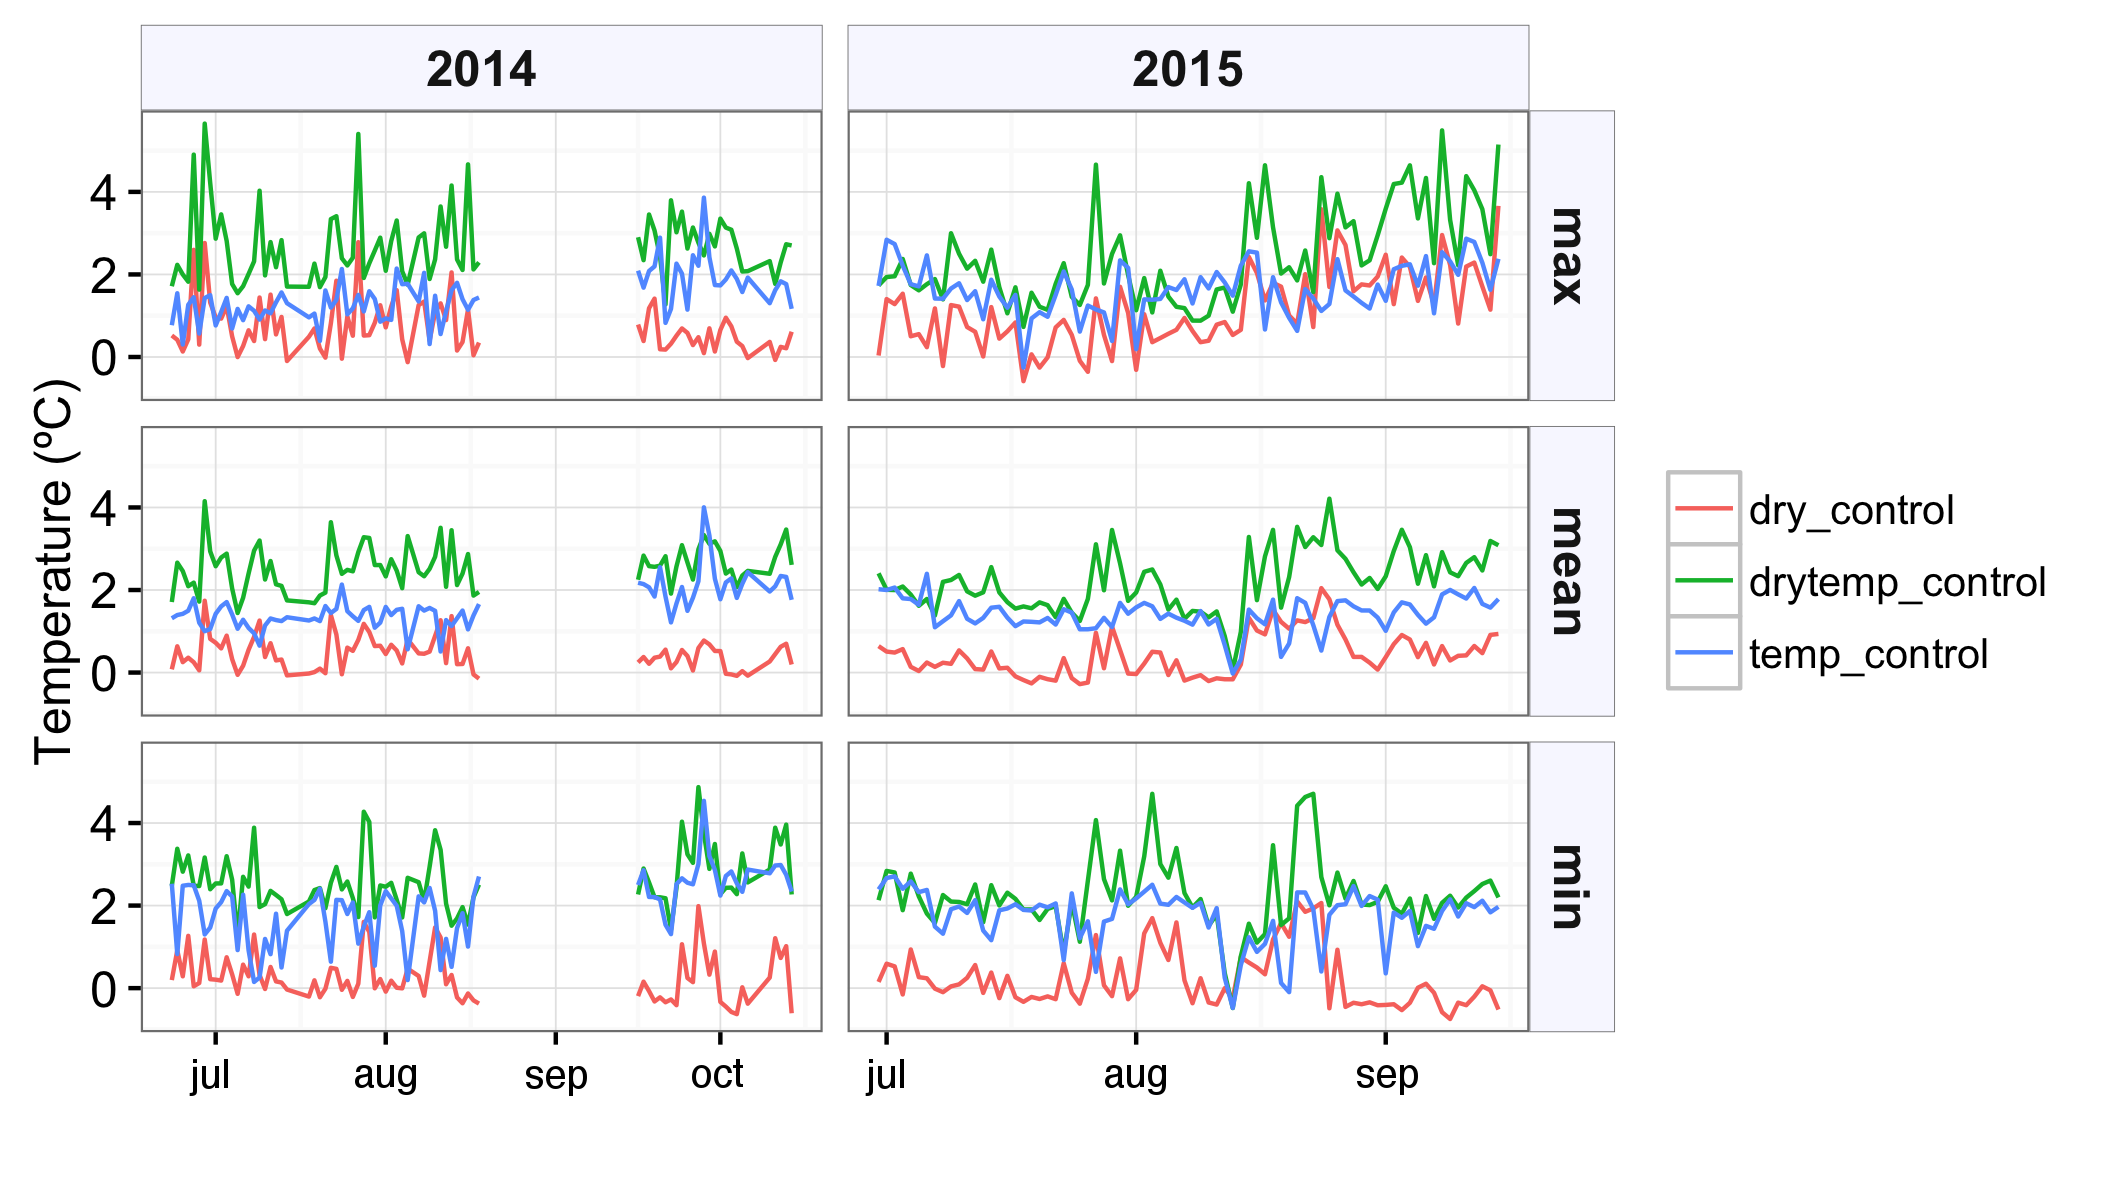


**Figure S2**. Difference in maximum, mean and minimum temperatures between the control and each treatment for years 2014 and 2015. Dry_control, difference between the dry and the control treatment; drytemp_control, difference between the drytemp and the control treatment; temp_control, difference between the temp and the control treatment

**
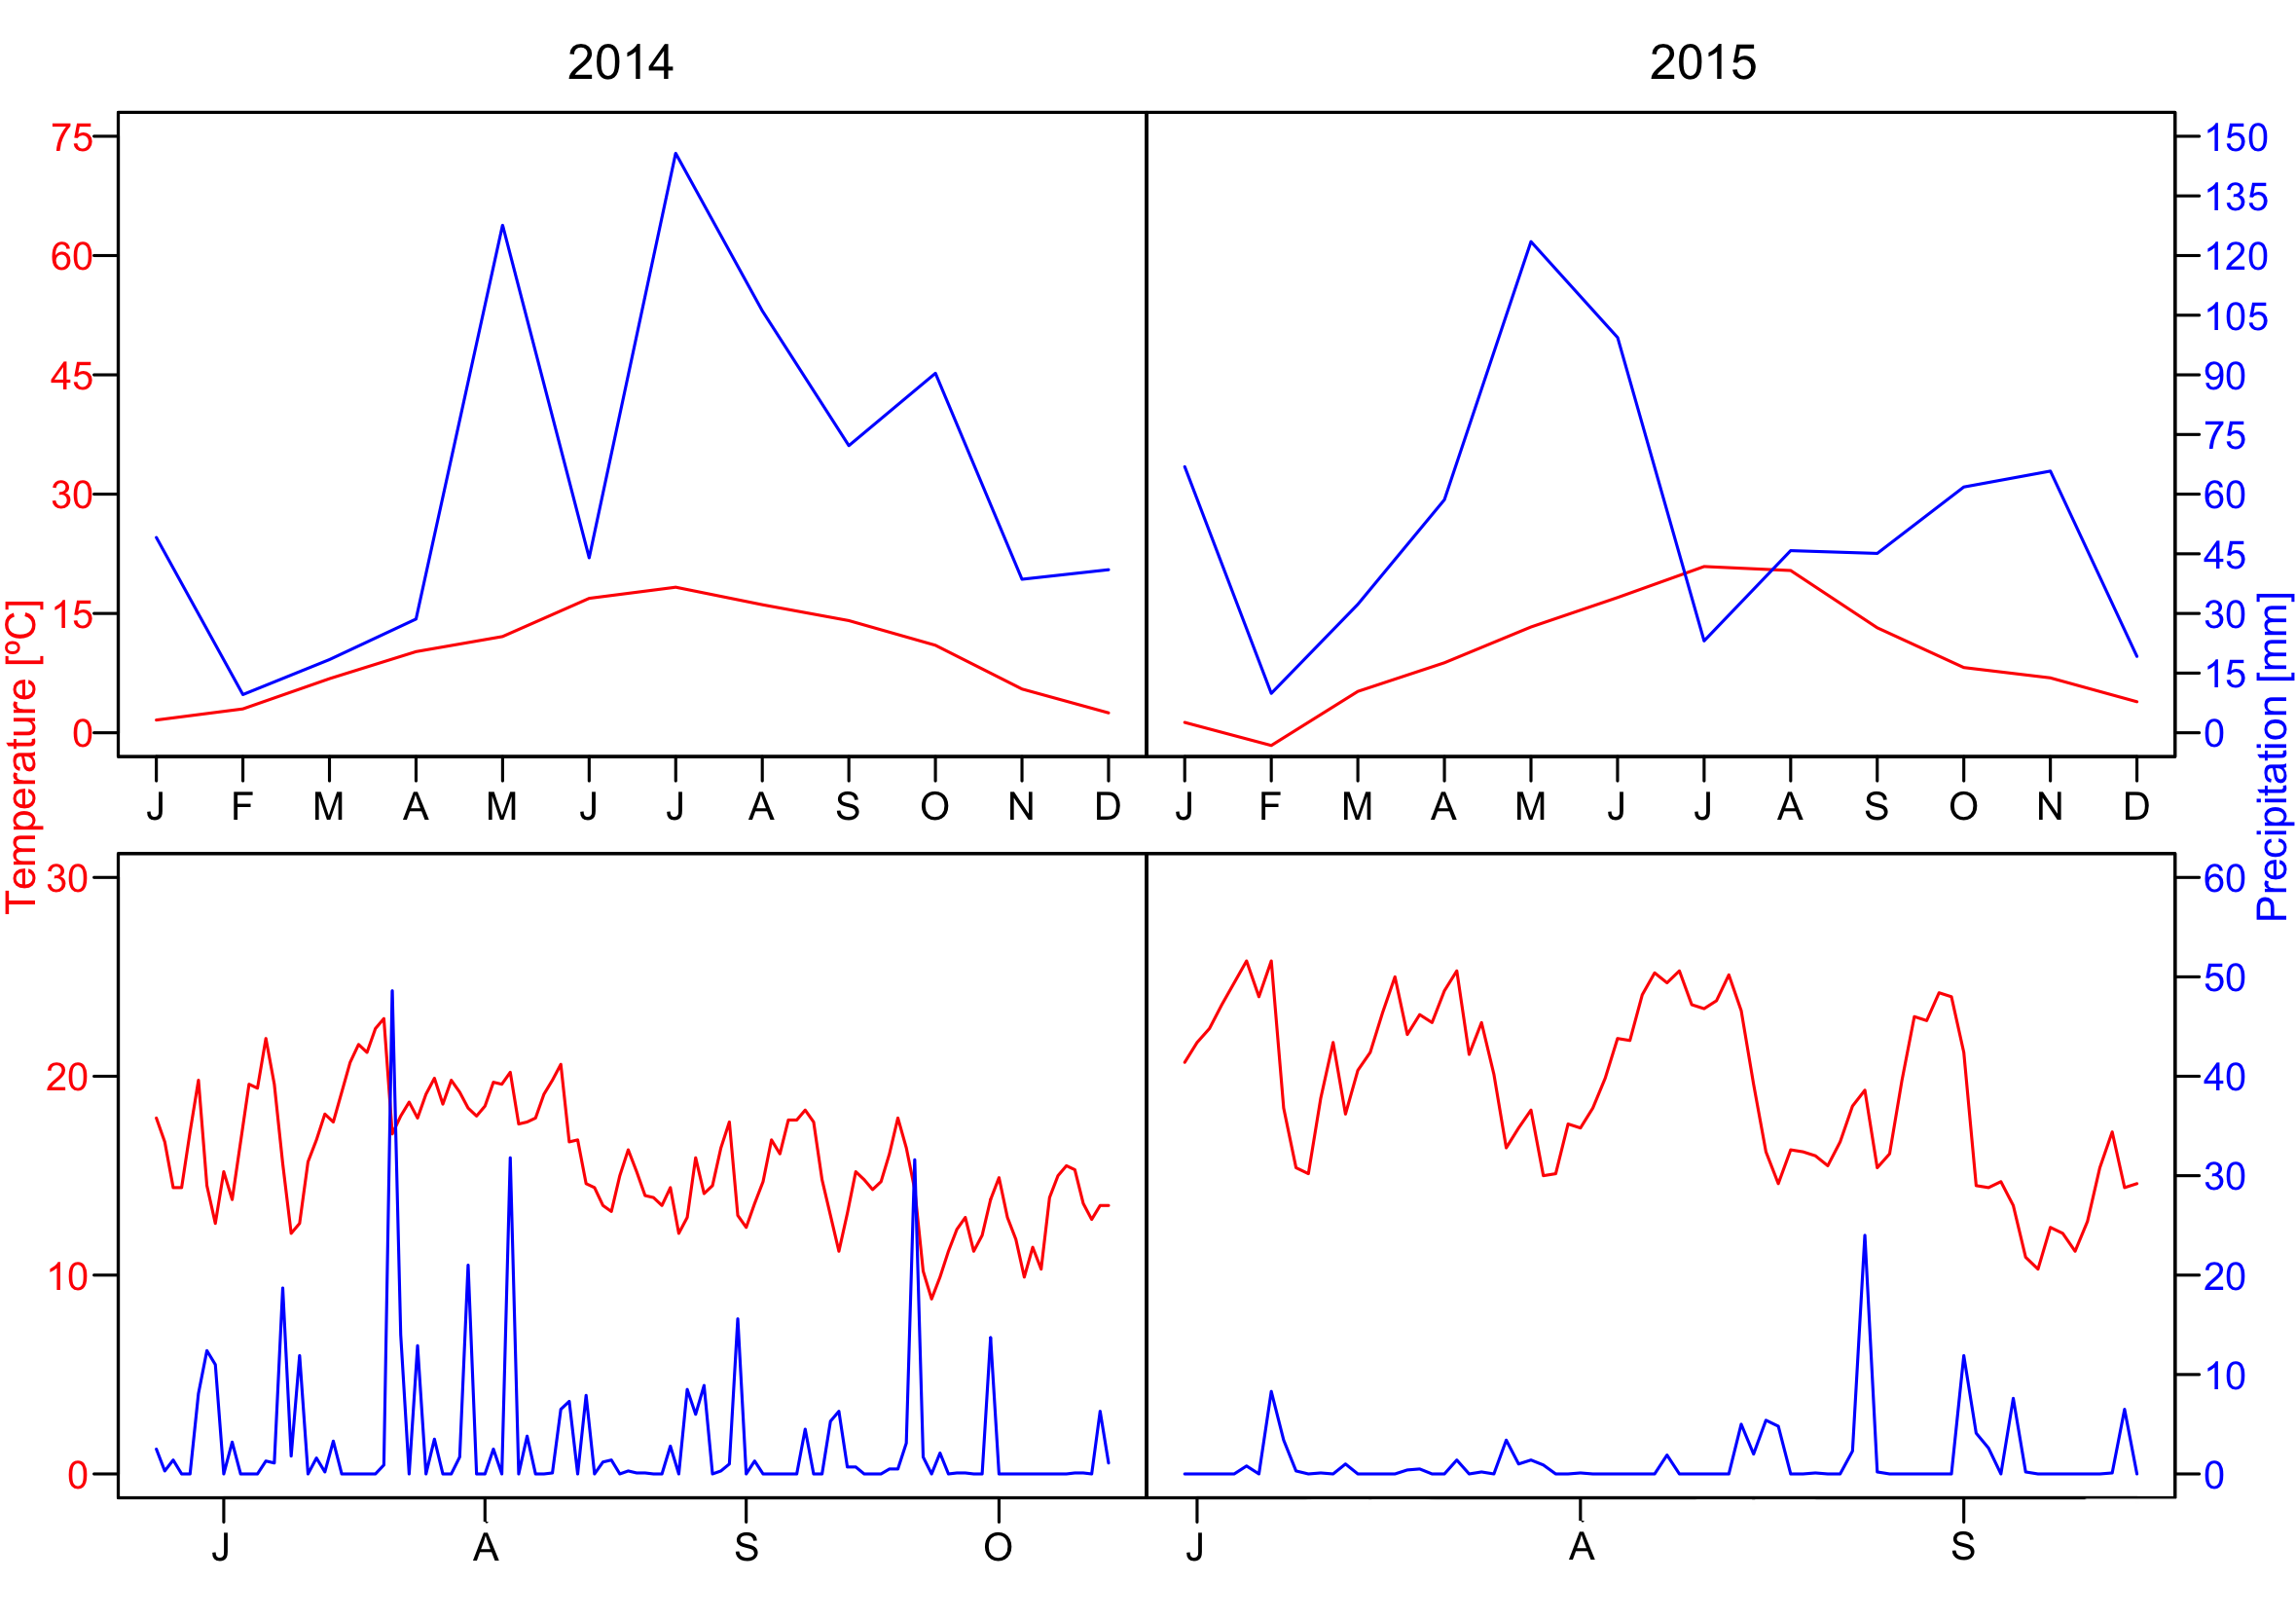
**

**Figure S3.** Climatographs of the years 2014 and 2015 (Upper panels) and daily mean temperature and total precipitation during the study periods in 2014 and 2015 (Bottom panels). Data obtained from the climatic station Weihenstephan-Dürnast from the German Metereological service located at ~300 m distance from our study site.

*
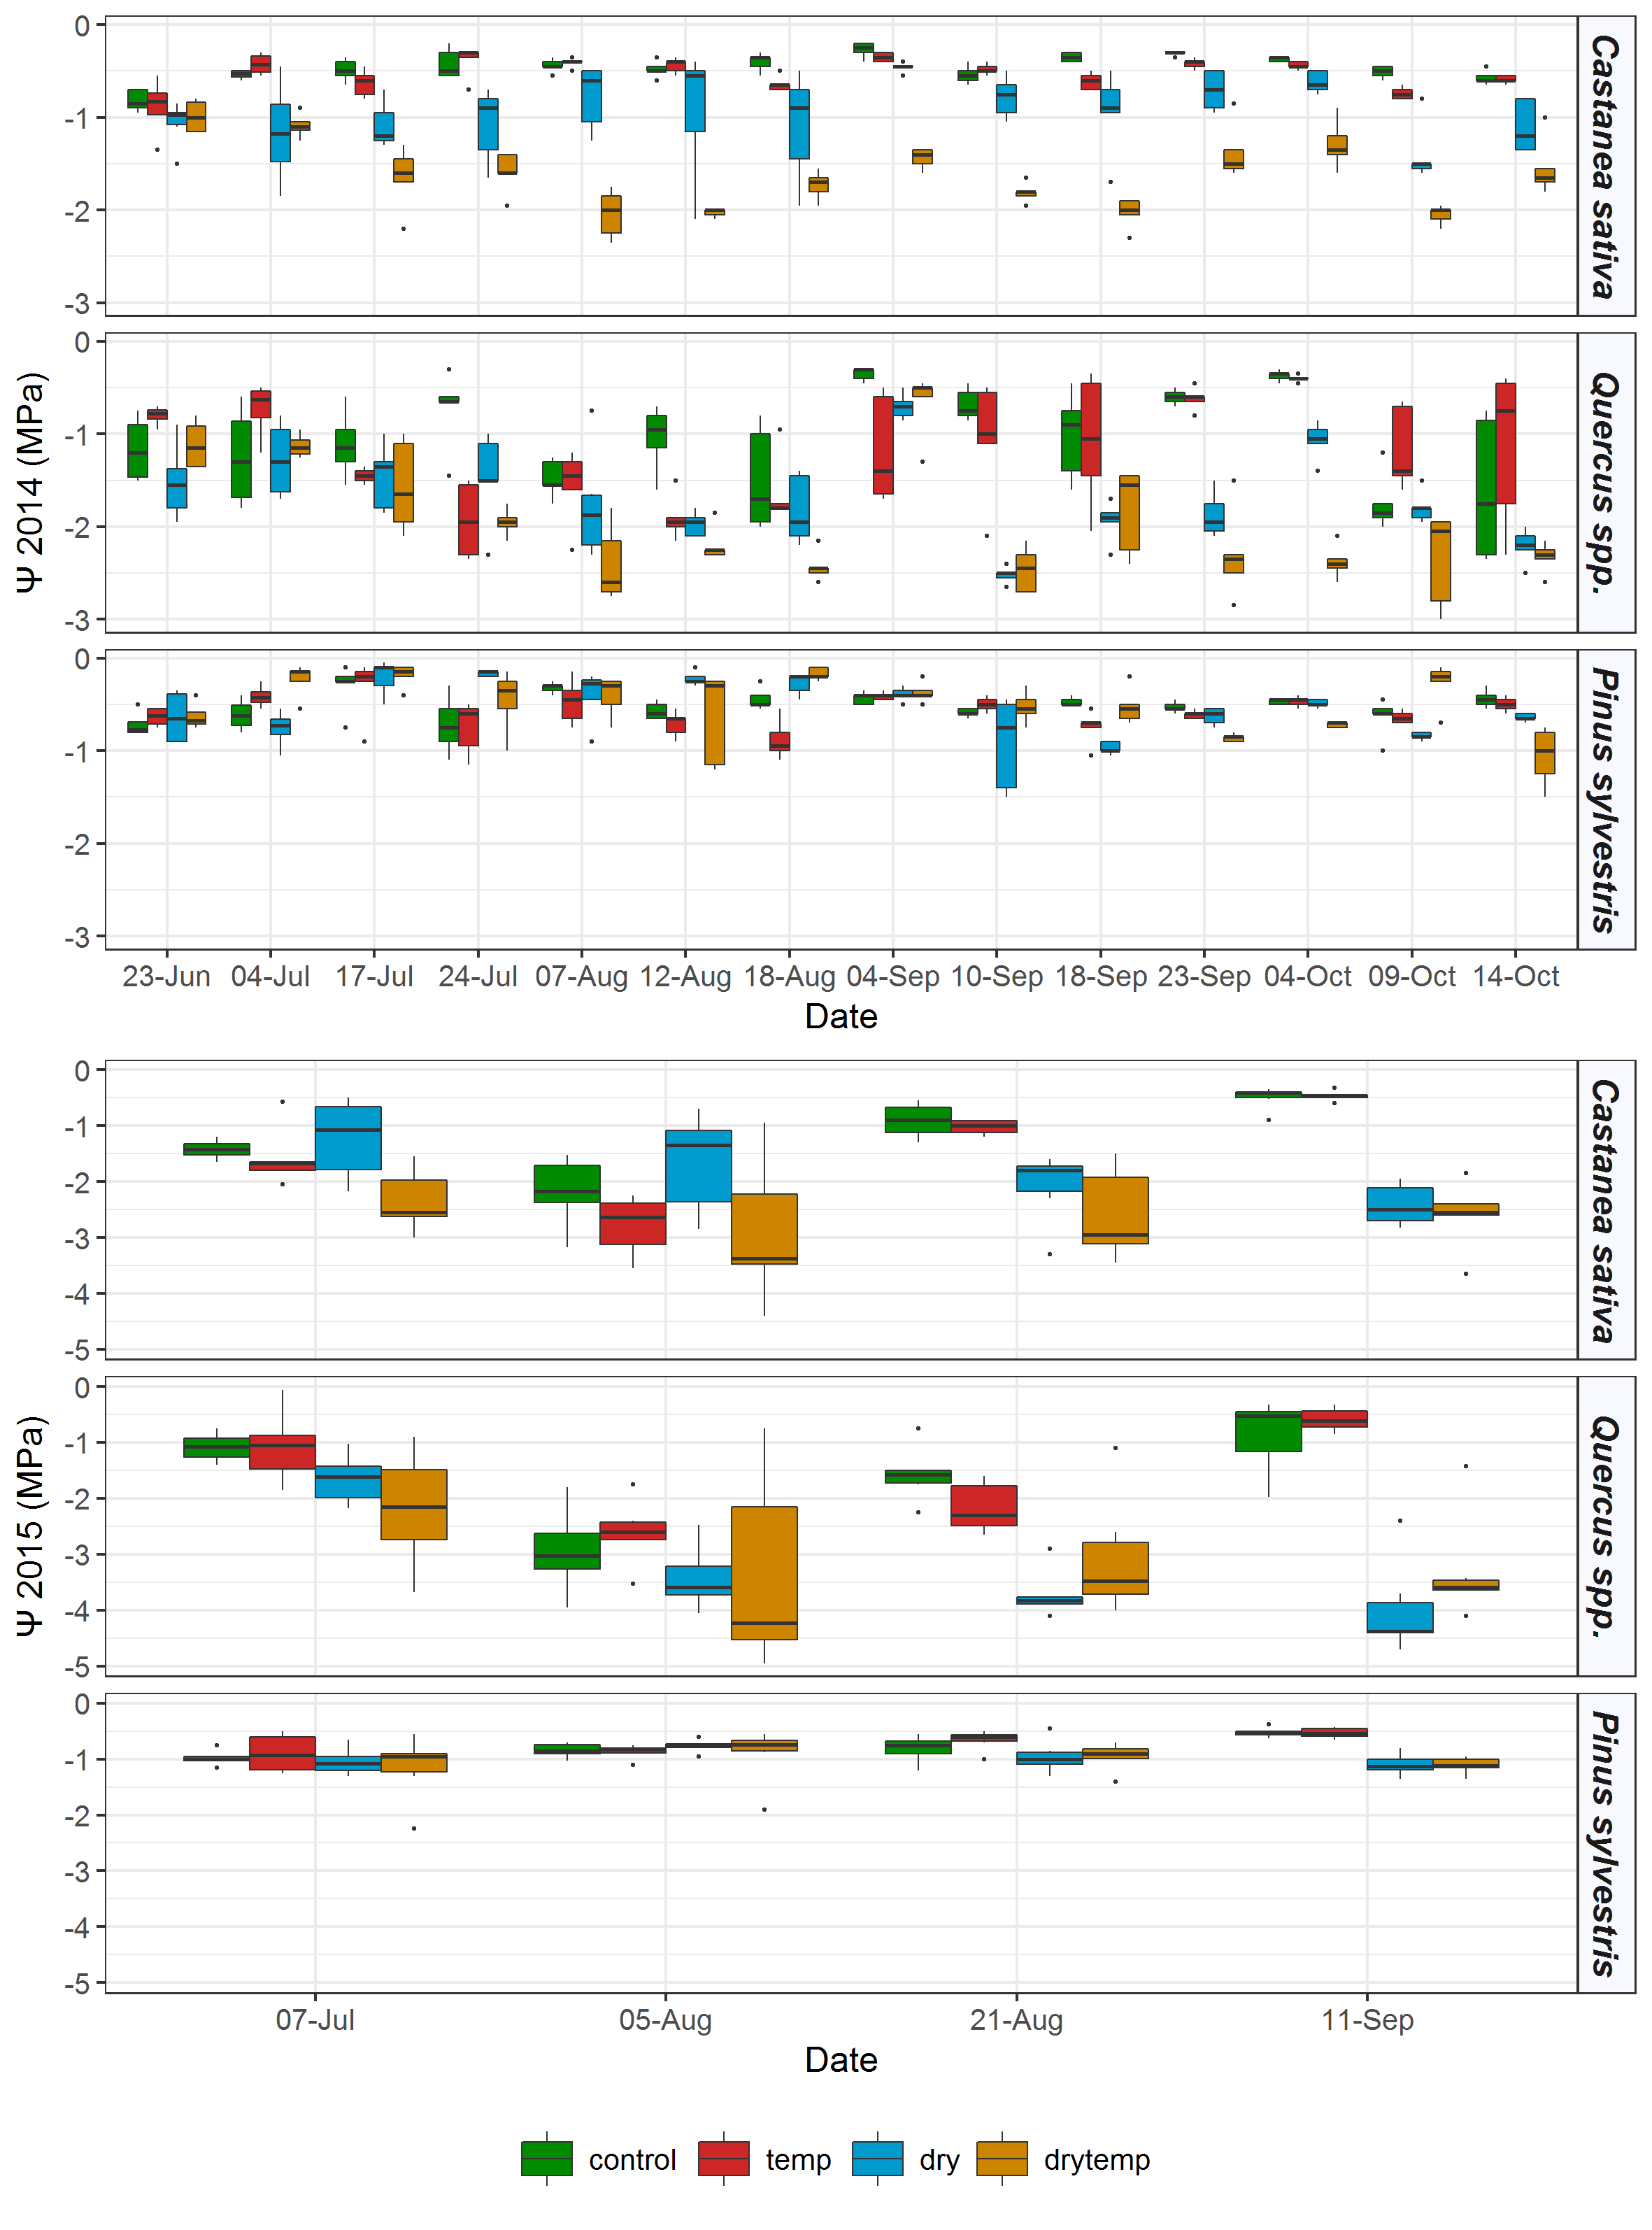
*

**Figure S4.** Water potentials per treatment and species measured in 2014 (upper panel) and 2015 (lower panel).

**Supplementary Table S1.** Dimensions of the 3-year old internode segments as mean value ± standard deviation (n=12) per treatment.

| **Species** | **Treatment** | **Diameter (mm)** | **Length (cm)** |
| --- | --- | --- | --- |
| *Castanea sativa* | control | 59.42 ± 53.72 | 38.58 ±12.59 |
|  | temp | 54.25 ± 45.88 | 33.08 ± 8.70 |
|  | dry | 76.83 ± 47.47 | 35.67 ± 9.27 |
|  | drytemp | 87.83 ± 29.45 | 30.75 ± 9.58 |
| *Quercus spp.* | control | 89.25 ± 35.07 | 33.08 ± 14.15 |
|  | temp | 95.75 ± 43.75 | 14.67 ± 8.75 |
|  | dry | 100.50 ± 23.43 | 28.00 ± 10.57 |
|  | drytemp | 83.83 ± 12.18 | 20.00 ± 11.09 |
| *Pinus sylvestris* | control | 57.58 ± 25.91 | 49.67 ± 8.14 |
|  | temp | 48.41 ± 48.42 | 30.50 ± 24.54 |
|  | dry | 32.75 ± 12.60 | 40.75 ± 11.34 |
|  | drytemp | 39.08 ± 31.70 | 42.58 ± 7.46 |

**Supplementary Table S2.** Influence of the density of seedlings in the studied variables. Values presented include the mean and standard deviations. Pairs in bold denote significant differences between groups (*p*<0.05). HD, high density; LD, low density; KS-NATIVE, xylem specific-native hydraulic conductivity; KS-MAX, xylem specific-maximum hydraulic conductivity; PLC, percentage of loss of conductivity.

|  |  |  | ***Castanea sativa*** | | ***Quercus spp.*** | | ***Pinus sylvestris*** | |
| --- | --- | --- | --- | --- | --- | --- | --- | --- |
| **Variable** | **Year** | **Treatment** | **HD** | **LD** | **HD** | **LD** | **HD** | **LD** |
| Diameter increment (mm) | 2014 | control | 3.21 ± 1.08 | 3.77 ± 1.51 | 2.84 ± 0.57 | 1.78 ± 2.36 | 4.53 ± 1.18 | 4.95 ± 1.54 |
|  |  | temp | 3.78 ± 1.53 | 4.21 ± 1.19 | 2.58 ± 1.23 | 2.31 ±0.48 | 4.71 ± 1.61 | 4.89 ± 1.32 |
|  |  | dry | 1.93 ± 0.99 | 1.98 ±0.68 | 1.07 ± 0.51 | 1.64 ± 1.05 | 3.10 ± 0.68 | 3.44 ± 0.79 |
|  |  | drytemp | 1.42 ± 0.32 | 1.81 ± 0.61 | 0.68 ± 0.41 | 1.13 ± 0.50 | 2.72 ± 0.97 | 1.98 ± 0.56 |
|  | 2015 | control | **3.41 ± 0.59** | **4.63 ±1.11** | 2.39 ± 1.27 | 1.98 ± 1.32 | 5.31 ± 0.77 | 6.20 ± 2.06 |
|  |  | temp | 3.59 ± 0.99 | 4.30 ± 0.72 | 1.21 ± 0.52 | 1.23 ± 0.54 | 4.40 ± 0.79 | 4.52 ± 2.03 |
|  |  | dry | **3.64 ± 2.33** | **1.02 ± 1.16** | 1.98 ± 0.92 | 2.23 ± 0.76 | 3.78 ± 1.02 | 4.89 ± 0.55 |
|  |  | drytemp | 1.48 ± 1.19 | 0.87 ± 1.58 | 0.82 ± 1.86 | 0.79 ± 0.70 | 4.87 ± 2.11 | 4.01 ± 0.95 |
| Height increment (mm) | 2014 | control | 77.83 ± 30.79 | 131.00 ± 62.88 | 115.33 ± 60.32 | 53.60 ± 69.21 | **123.00 ± 23.44** | **79.60 ± 26.51** |
|  |  | temp | 80.00 ± 37.30 | 107.67 ± 55.01 | 70.67 ± 39.33 | 60.67 ± 71.33 | 106.67 ± 23.04 | 90.33 ± 18.05 |
|  |  | dry | 36.00 ± 57.04 | 18.83 ± 29.22 | 62.67 ± 34.73 | 52.83 ± 30.38 | 102.33 ± 26.92 | 116.50 ± 12.41 |
|  |  | drytemp | 63.17 ± 45.46 | 67.33 ± 55.78 | 53.17 ± 46.60 | 15.83 ± 19.59 | 100.33 ± 12.53 | 91.40 ± 33.45 |
|  | 2015 | control | 96.83 ± 54.87 | 160.17 ± 130.47 | 160.83 ± 137.72 | 76.20 ± 56.64 | 80.83 ± 59.96 | 76.00 ± 56.63 |
|  |  | temp | 66.17 ± 92.22 | 76.50 ± 41.61 | 45.00 ± 41.79 | 36.83 ± 56.72 | 45.33 ± 40.80 | 53.83 ± 34.36 |
|  |  | dry | 47.17 ± 43.52 | 50.80 ± 37.35 | 34.00 ± 60.29 | 84.67 ± 97.53 | 53.17 ± 29.48 | 61.33 ± 20.64 |
|  |  | drytemp | **18.40 ± 10.69** | **45.00 ± 14.92** | 19.50 ± 26.76 | 16.67 ± 16.43 | 68.67 ± 41.43 | 42.80 ± 15.47 |
| KS-NATIVE | 2015 | control | 1.30 ± 0.69 | 2.21 ± 1.21 | 0.40 ± 0.24 | 0.69 ± 0.53 | 1.06 ± 0.26 | 1.00 ± 0.06 |
|  |  | temp | 1.15 ± 1.52 | 0.62 ± 0.93 | 0.76 ± 0.54 | 0.41 ± 0.26 | 1.17 ± 0.35 | 1.27 ± 0.32 |
|  |  | dry | **1.03 ± 1.05** | **0.03 ± 0.05** | **0.15 ± 0.14** | **0.90 ± 0.63** | 1.20 ± 0.09 | 1.17 ± 0.15 |
|  |  | drytemp | 0.12 ± 0.28 | 0.02 ± 0.00 | 0.66 ± 1.09 | 0.11 ± 0.17 | 0.94 ± 0.28 | 0.78 ± 0.25 |
| KS-MAX | 2015 | control | 3.07 ± 1.38 | 4.32 ± 1.23 | 2.24 ± 1.30 | 1.38 ± 1.14 | 1.10 ± 0.25 | 1.03 ± 0.06 |
|  |  | temp | 3.31 ± 1.63 | 1.59 ± 0.98 | 1.36 ± 0.59 | 1.30 ± 1.07 | 1.23 ± 0.36 | 1.28 ± 0.33 |
|  |  | dry | 2.68 ± 0.81 | 1.49 ± 1.15 | 0.89 ± 0.75 | 2.49 ± 2.75 | 1.22 ± 0.08 | 1.23 ± 0.14 |
|  |  | drytemp | **1.31 ± 1.27** | **0.08 ± 0.04** | 1.51 ± 1.52 | 0.99 ± 0.72 | 0.98 ± 0.30 | 0.81 ± 0.28 |
| PLC | 2015 | control | 55.16 ± 28.03 | 43.70 ± 32.54 | 71.85 ± 23.94 | 39.12 ± 23.23 | 3.54 ± 1.13 | 3.16 ± 1.31 |
|  |  | temp | 70.43 ± 36.99 | 65.60 ± 28.02 | 44.02 ± 21.41 | 58.59 ± 30.66 | **5.04 ± 2.05** | **0.68 ± 0.58** |
|  |  | dry | **60.27 ± 33.66** | **98.90 ± 2.98** | 62.98 ± 36.11 | 51.74 ± 24.84 | 1.59 ± 1.06 | 5.15 ± 3.32 |
|  |  | drytemp | 94.94 ± 9.00 | 73.08 ± 13.98 | 68.27 ± 28.98 | 72.51 ± 35.77 | 3.43 ± 2.20 | 3.92 ± 2.47 |
